# Supplementary material for: Prognostic Analysis of Human Pluripotent Stem Cells Based on Their Morphological Portrait and Expression of Pluripotent Markers
Source: MDPI journal article supplement (doi:10.3390/ijms232112902), 2022-10-26
Supplement: s1 [file s1]

## Supporting Information

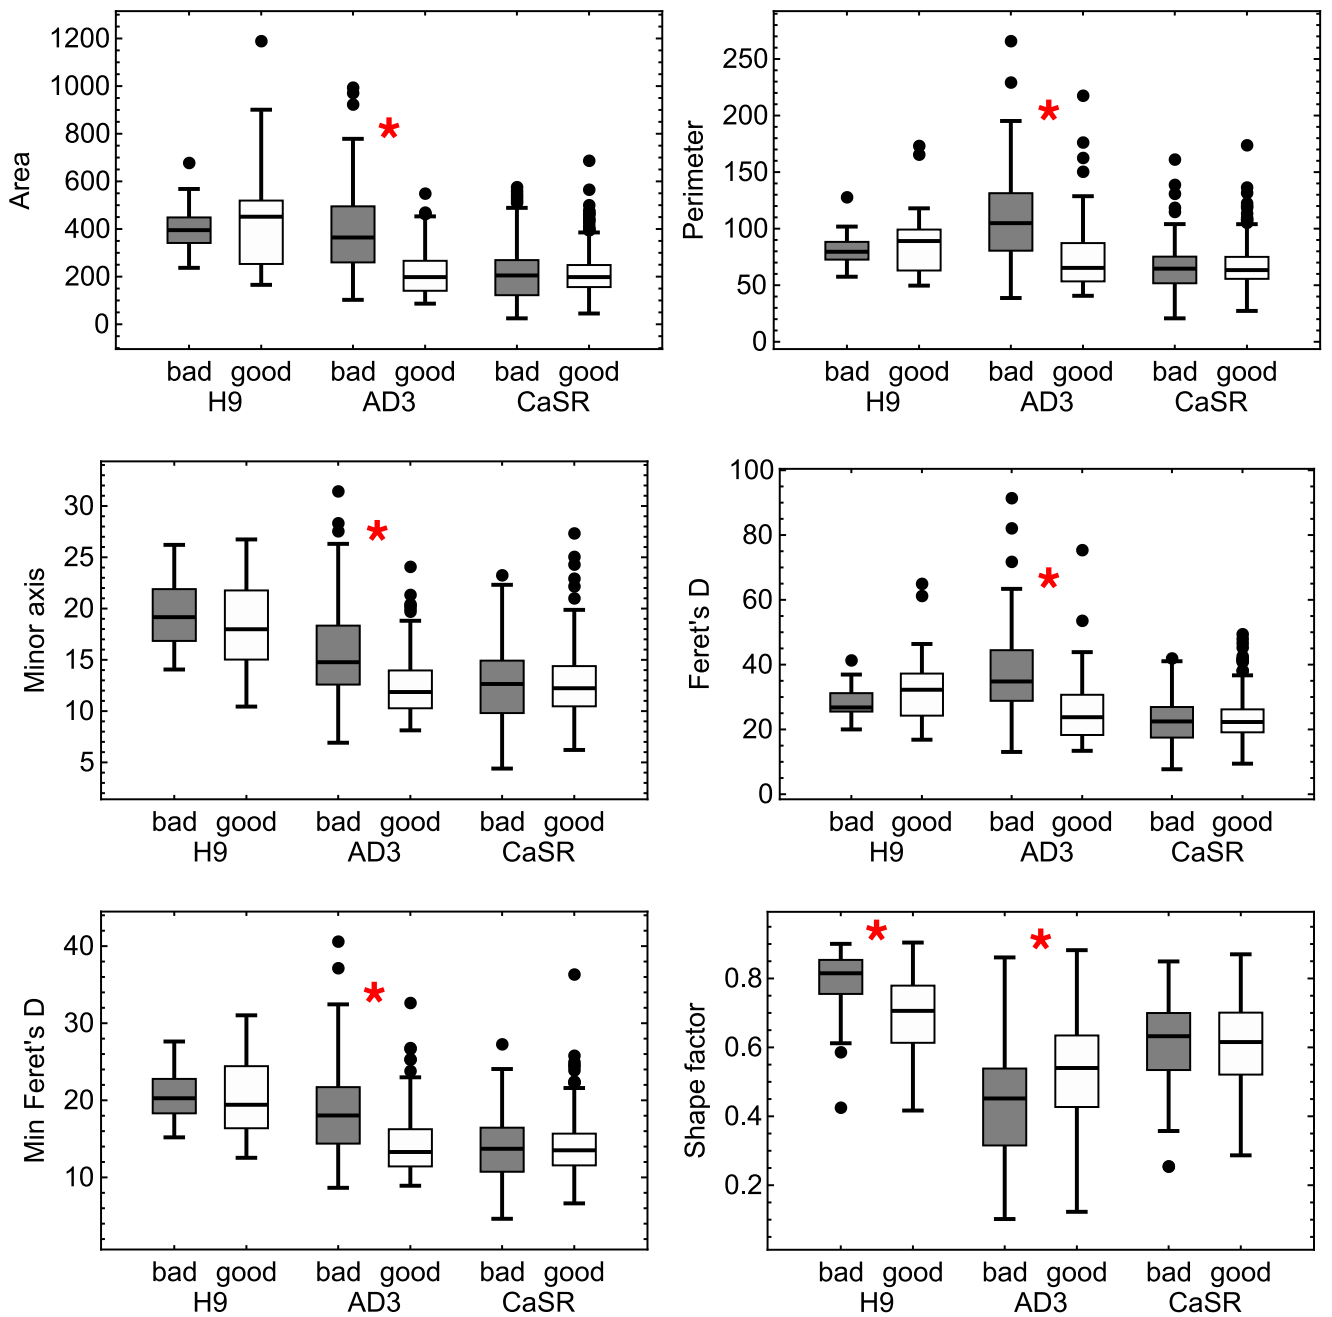

**Figure S1.** Boxplots showing the variance of cell morphological parameters within groups of different phenotypes for each cell line. Data comprises cells from all passages and for growth times in the range 24–48 hours. Dots mark outliers. Asterisks indicate groups with a statistically significant ( $P < 0.05$ ) difference between the mean values of the parameters.

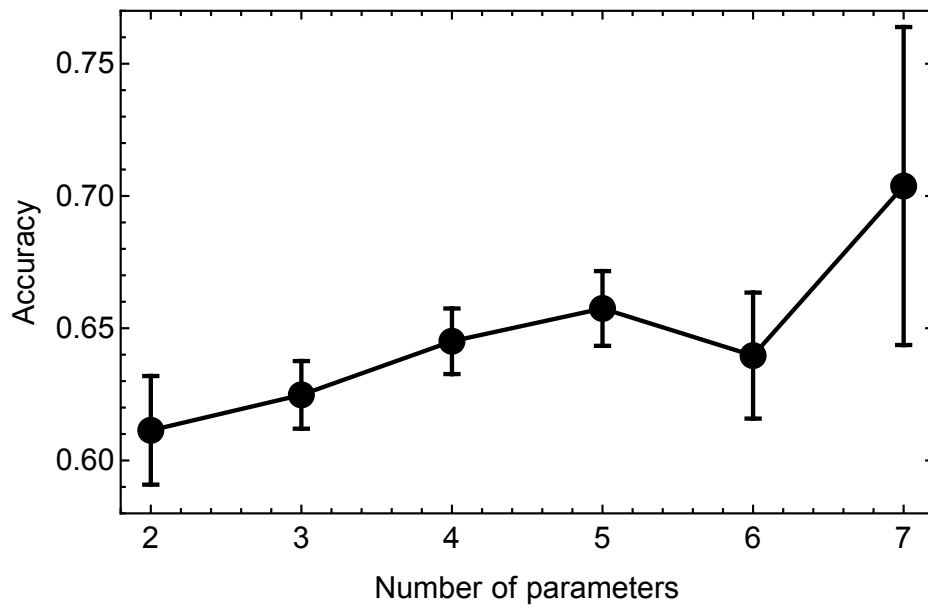

**Figure S2.** Mean accuracy of the phenotype classification models based on different subsets of colony morphological parameters as predictors. The values were obtained by averaging the cross-validation accuracies of classification models based on all possible subsets containing a given number of parameters (starting with two parameters). The error bars show the standard error of the mean.

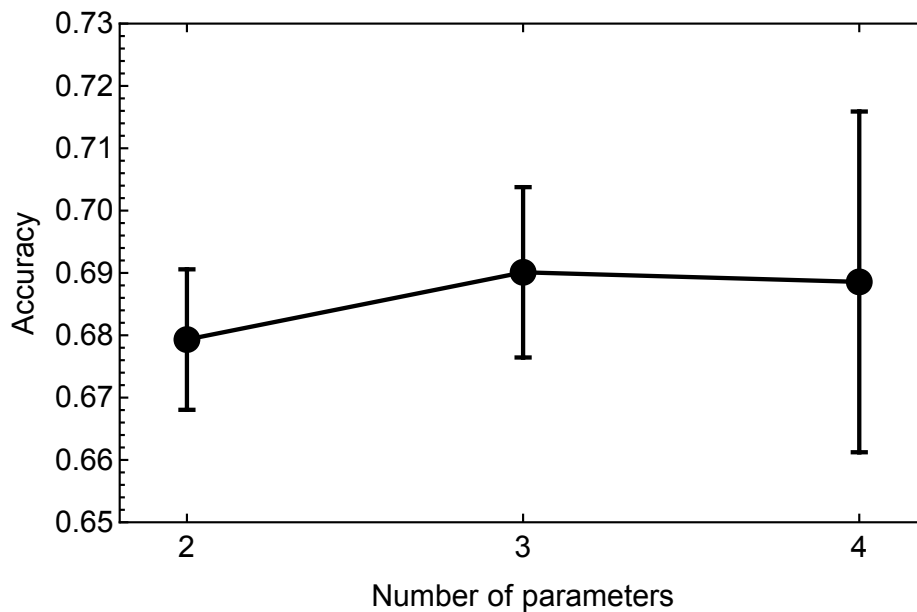

**Figure S3.** Mean accuracy of the phenotype classification models based on different subsets of four cell morphological parameters as predictors (Area, Perimeter, Minor axis, and Shape factor). The values were obtained by averaging the cross-validation accuracies of classification models based on all possible subsets containing a given number of cell parameters (starting with two parameters). The error bars show the standard error of the mean.

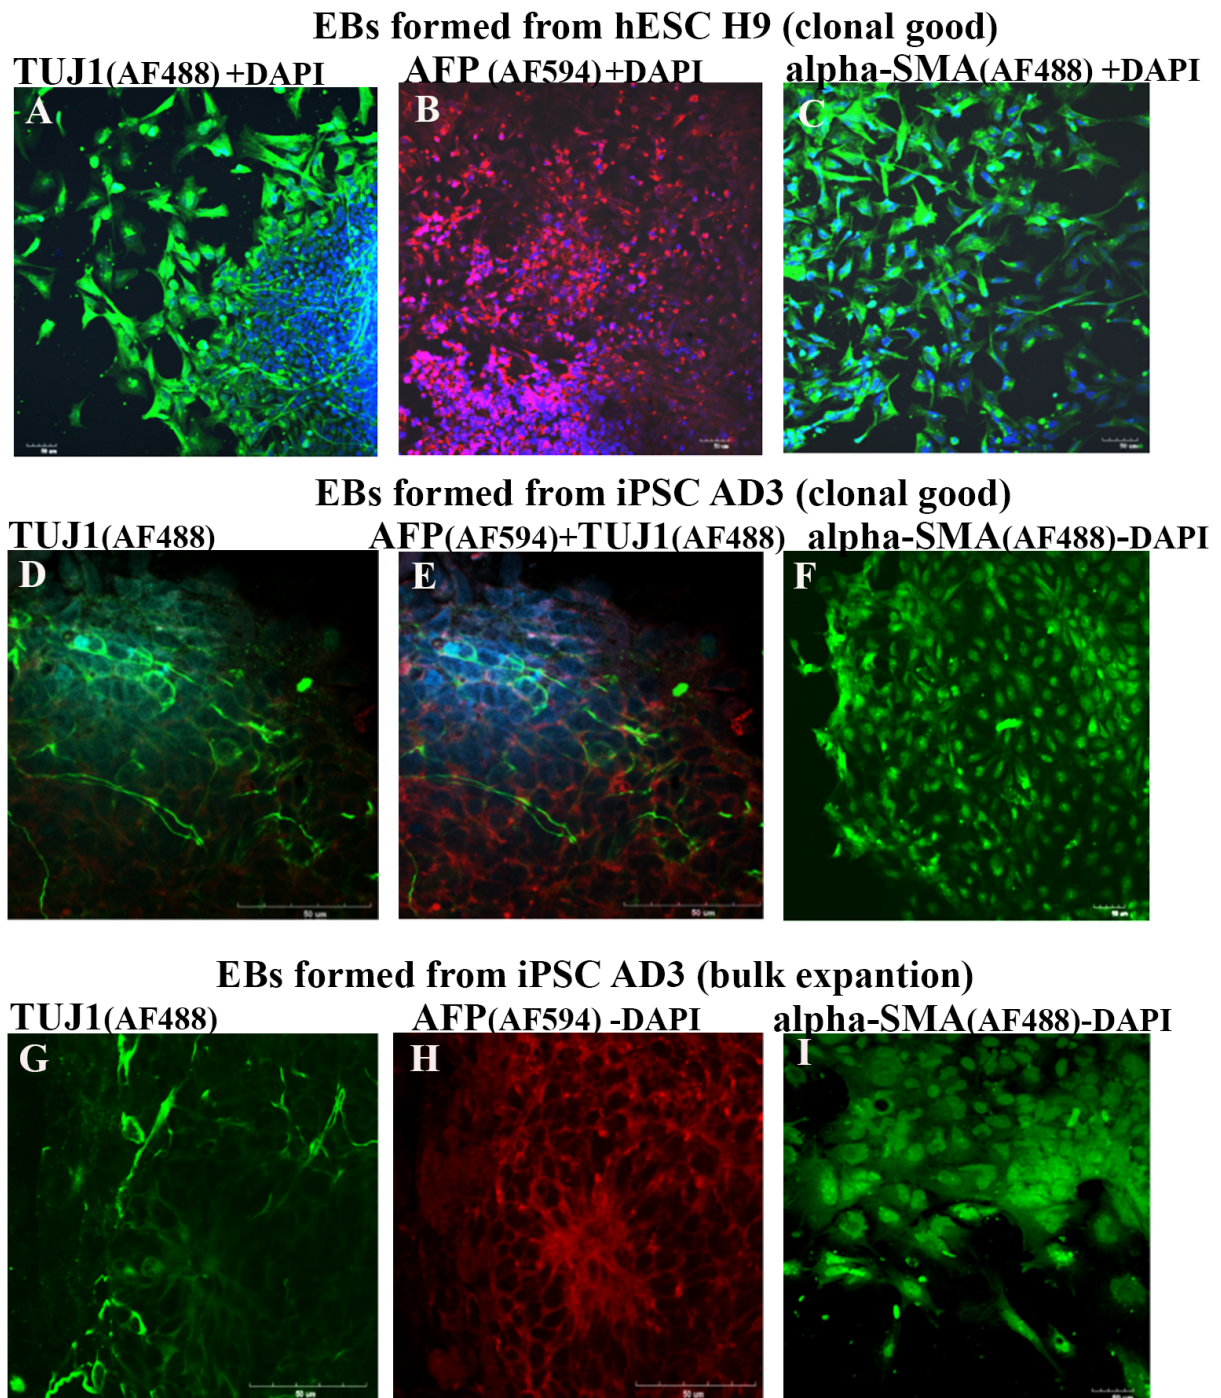

**Figure S4.** Fluorescence immunostaining of embryonic bodies (EBs) derived from hESC H9 and hiPSC AD3 after their manual clonal and bulk expansion. Representative positive confocal immunostaining images for common three germ layers markers: beta-III tubulin (TUJ1): for ectoderm, smooth muscle actin (alpha-SMA) for mesoderm, and alpha-fetoprotein (AFP) for endoderm. Immunofluorescence using this set of germ layer markers is particularly advantageous in that each of these markers is not only preferentially expressed in certain cell lineages, but each marker also displays a distinguishing cellular localization pattern that serves as an extra measure of visual confirmation. Please note an anti-TUJ1 staining is typically brightest for elongated cells with characteristic neuronal like projections (A, D, G). Cells that robustly express SMA display lined patterns of actin filament staining, which cells are often found in large layered groupings or as isolated, large cells (C, F, I). Anti-AFP staining commonly identifies tight clusters of cells (B, E, H). Scale bar: 50 µm.

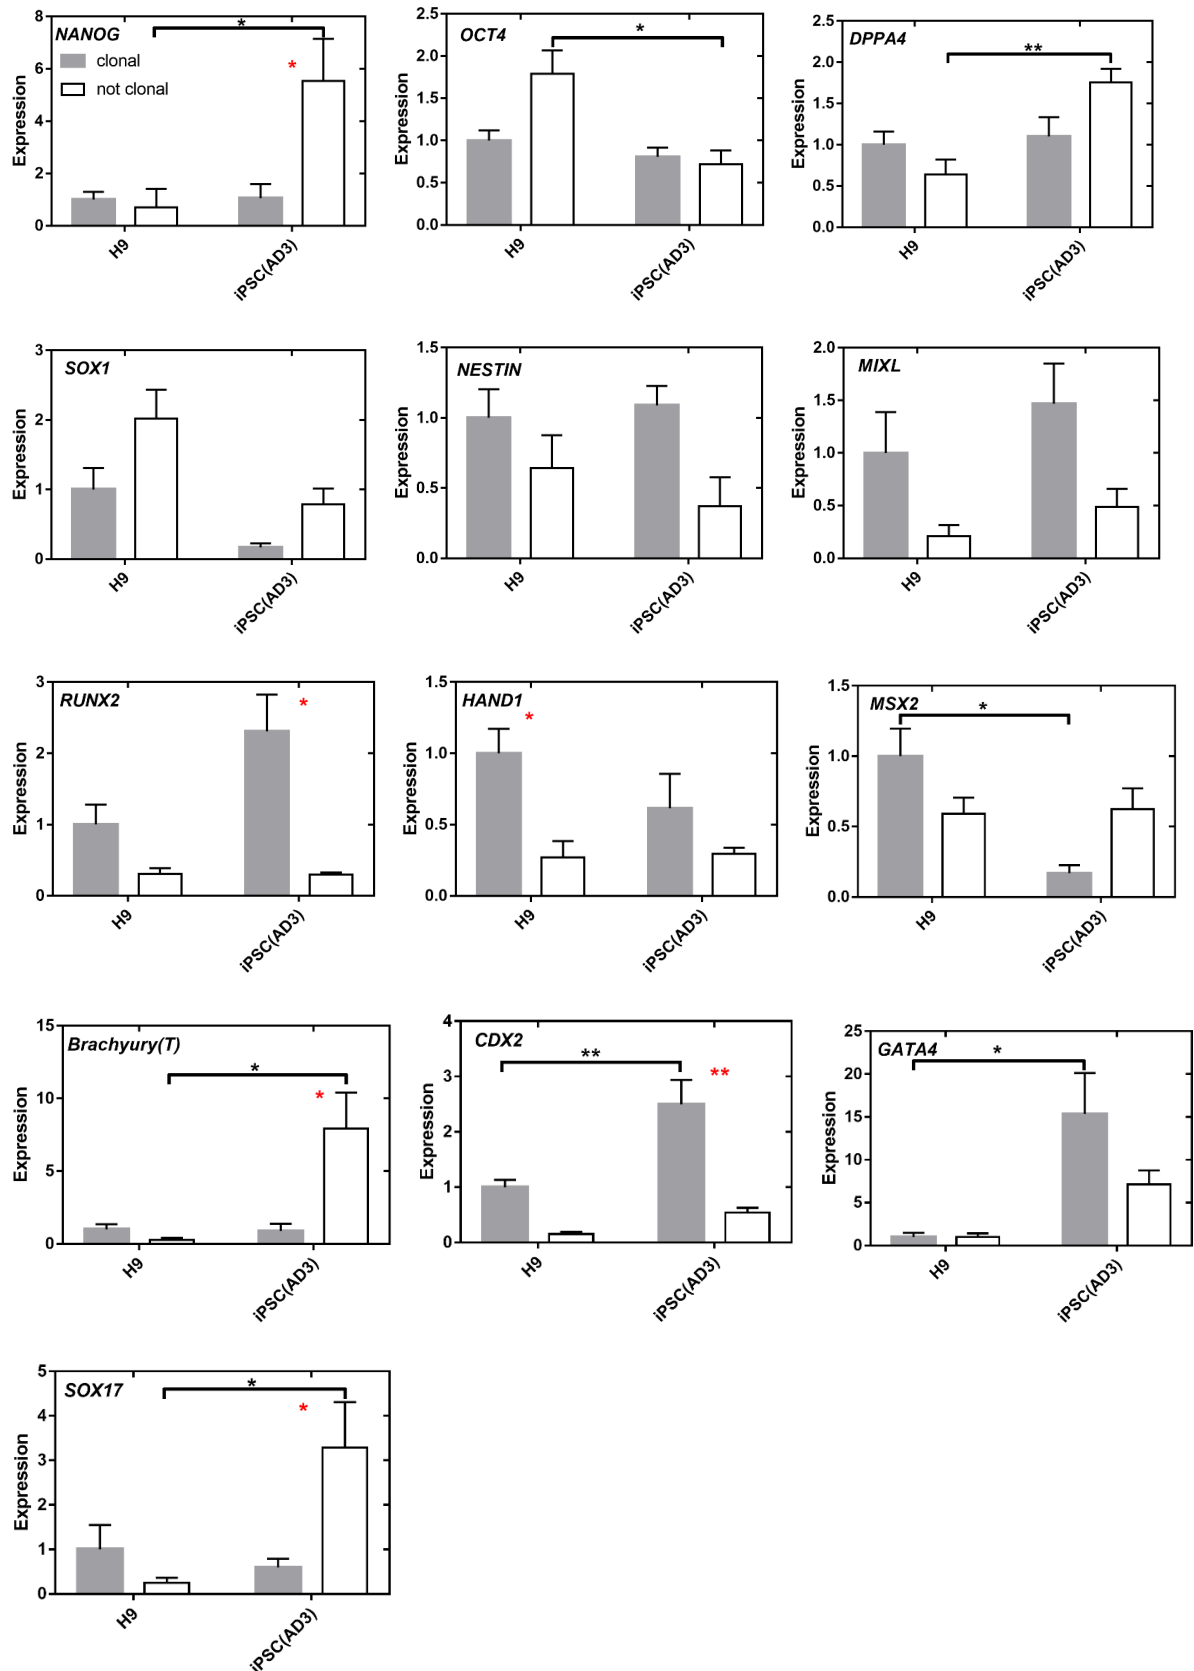

**Figure S5.** Expression of 13 genes (pluripotency marker genes: *NANOG*, *OCT4*, *DPPA4*; ectoderm marker genes: *SOX1*, *NESTIN*; mesoderm/mesendoderm marker genes: *RUNX2*, *MIXL1*, *MSX2*, *HAND1*, *BRACHYURY(T)*; endoderm marker genes: *CDX2*, *GATA4*, *SOX17*) in differentiating embryonic bodies derived from the hESC line H9 and hiPSC line AD3, measured in a clonal (gray) and nonclonal (white) colony of each line. Data are presented as mean  $\pm$  SEM. \*,  $P < 0.05$ ; \*\*,  $P < 0.01$ . Red asterisks point out the comparison of gene expression between clonal and nonclonal colonies, black asterisks point out the comparison between two different cell lines.

### Text S1. Classification with manual cross-validation

Classification models in the main text were trained and validated using the Wolfram Mathematica function *Classify* with the default ‘ValidationSet’ option. In this form, the function performs the training on a data with automatic cross-validation, in which validation sets are automatically sampled from the data during the training process, so the user does not need to manually split the data into training and validation datasets. As a control, we performed computational experiments on classification on the cellular data with the manual cross-validation. First, we randomly selected 10% of the cellular data as the test dataset. Second, we randomly split the rest of the data into a training dataset (80% of the split data) and validation dataset (20%), where the validation dataset was aimed to evaluate the model performance during training. The proportion of cells from each cell line in the data remained the same across all data subsets considered. We repeated the last procedure 50 times, so at the output we had one test dataset and 50 pairs of training and validation datasets. We used each pair of these training and validation datasets to retrain the classification models using either four morphological parameters (‘full model’) or the two best parameters (Perimeter and Shape factor; ‘minimal model’) as predictors, by running (50 times) the following command in Mathematica:

```
Classify[training_set, Method → “NeuralNetwork”, ValidationSet → validation_set, PerformanceGoal → "Quality"],
```

where *training\_set* is one of the 50 training datasets, *validation\_set* is the corresponding validation set used to validate the model performance during the training, and all other options were the same as in the computational experiments used to train the classification models reported in the main text. After obtaining 50 classification models resulted from the multiple running of this command, we calculated the classification accuracy of all models on their training and validation datasets and on the test dataset (Figure S6).

Figure S6 shows that the values of classification accuracy calculated on all data subsets are, on average, very close to each other and very close to the accuracy values reported in the text. Accuracy on the validation sets was  $69\pm 2\%$  for the full model as compared to  $69\pm 3\%$  reported in the main text, and  $67\pm 2\%$  for the minimal model compared to  $68\pm 3\%$  reported in the main text. A statistically significant ( $P < 0.05$ ) difference between accuracy on different datasets was recorded only for the training datasets vs. the validation and test datasets for the minimal model (Figure S6), but the absolute values of the average accuracy on these datasets differed from each other by only one percent, which allows us to consider the slight overtraining observed for the minimal model as inessential. Therefore, we conclude that the model training procedure with the default options for validation that was used in the main text produced reliable results.

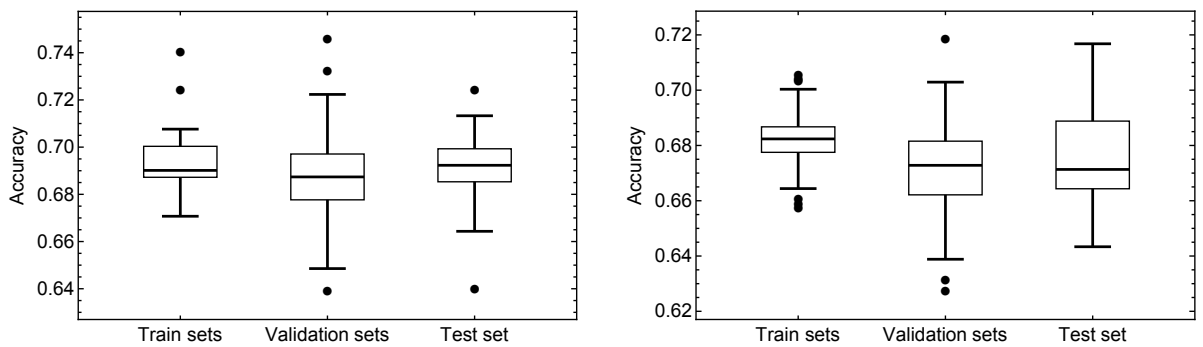

**Figure S6.** Classification accuracy values of the full (left panel) and minimal (right panel) models from the computational experiments with the manual cross-validation, obtained on the train, validation, and test datasets. The average accuracy  $\pm$  SD for the full model:  $69\pm 1\%$  (training datasets),  $69\pm 2\%$  (validation datasets), and  $69\pm 1\%$  (test dataset). The average accuracy  $\pm$  SD for the minimal model:  $68\pm 1\%$  (training datasets),  $67\pm 2\%$  (validation datasets), and  $68\pm 2\%$  (test dataset). Mann–Whitney test for the difference between accuracy on different datasets: train vs. validation,  $P = 0.11$  (full model) and  $P = 0.002$  (minimal model); train vs. test,  $P = 0.99$  (full model) and  $P = 0.02$  (minimal model); validation vs. test,  $P = 0.17$  (full model) and  $P = 0.48$  (minimal model).

**Table S1.** List of qRT-PCR primers.

|                                       | Gene   | Forward Primer                     | Reverse Primer                     |
|---------------------------------------|--------|------------------------------------|------------------------------------|
| Pluripotency marker genes             | DNMT3B | GGA GAC TCA TTG GAG GAC CA         | ACG ACG CAC CTT CGA CTT AT         |
|                                       | SALL4  | AGC ACA TCA ACT CGG AGG AG         | CCT GGG TGG TTC ACT GGA G          |
|                                       | IGF1R  | AGG GGT TTG TGA TCC ACG AC         | TGC CCT TGA AGA TGG TGC AT         |
|                                       | CD9    | AAG TTA GCC CTC ACC ATG CC         | CTG AGA GTC GAA TCG GAG CC         |
|                                       | DPPA4  | TGC CCT AAG AAA AAG GCA GA         | CTC AGC TTC AAT TGT TGG CA         |
|                                       | OCT4   | GAG AAC CGA GTG AGA GGC AAC C      | CAT AGT CGC TGC TTG ATC GCT TG     |
|                                       | NANOG  | AAT ACC TCA GCC TCC AGC AGA TG     | TGC GTC ACA CCA TTG CTA TTC TTC    |
|                                       | REX1   | TGT CCT CAG GCT GGG TAG TC         | TGA TTT TCT GCC GTA TGC AA         |
|                                       | SOX2   | TTG TTC GAT CCC AAC TTT CC         | ACA TGG ATT CTC GGC AGA CT         |
|                                       | KLF4   | TTA CCA AGA GCT CAT GCC ACC        | GCG AAT TTC CAT CCA CAG CC         |
| Ectoderm marker genes                 | SOX1   | GGA ATG GGA GGA CAG GAT TT         | ACT TTT ATT TCT CGG CCC GT         |
|                                       | NESTIN | GAGAGGGAGGACAAAGTCCC               | CCA CTT CCT CAG ACT GCT CC         |
| Mesoderm/<br>mesendoderm marker genes |        | CCG CCT CAG TGA TTT AGG GC         | GGG TCT GTA ATC TGA CTC TGT CC     |
|                                       | RUNX2  |                                    |                                    |
|                                       | MIXL   | GAGACTTGGCACGCCTGT                 | GGT ACC CCG ACA TCC ACT T          |
|                                       | HAND1  | ACC AGC TAC ATC GCC TAC CTG ATG    | TCC CTA TTA ACG CCG CTC CAT        |
|                                       | MSX2   | TGG ATG CAG GAA CCC GG             | AGG GCT CAT ATG TCT TGG CG         |
|                                       | T      | CAG TGG CAG TCT CAG GTT AAG AAG GA | CGC TAC TGC AGG TGT GAG CAA        |
| Endoderm marker genes                 | CDX2   | CTC GGC AGC CAA GTG AAA AC         | CTC CTT TGC TCT GCG GTT CT         |
|                                       | SOX17  | CGC ACG GAA TTT GAA CAG TA         | GGA TCA GGG ACC TGT CAC AC         |
|                                       | GATA4  | TCC AAA CCA GAA AAC GGA AG         | AAG GCT CTC ACT GCC TGA AG         |
| Housekeeping genes                    | RN18S  | GAA ACT GCG AAT GGC TCA TTA A      | GAA TTA CCA CAG TTA TCC AAG TAG GA |
|                                       | RPLI3A | CCT GGA GGA GAA GAG GAA AGA GA     | TTG AGG ACC TCT GTG TAT TTG TCA A  |
|                                       | GAPDH  | TGC ACC ACC AAC TGC TTA GC         | GGC ATG GAC TGT GGT CAT GAG        |
